# Supplementary material
Source: publisher site journal article supplement (https://www.dovepress.com/article/492461)
Supplement: Supplementary file 1 [file get_supplementary_file.php]

**Table S1.** Searching Strategy

| **Database** | **Concept** | **Search Term** | **Result** | **Date** |
| --- | --- | --- | --- | --- |
| Pubmed | Concept 1 | "chronic disease"[Title/Abstract] OR "Copd"[Title/Abstract] OR "chronic obstructive pulmonary disease"[Title/Abstract] OR "asthma"[Title/Abstract] OR "hypertension"[Title/Abstract] OR "hyperlipidemia"[Title/Abstract] OR "diabetes mellitus"[Title/Abstract] | 987.081 | 18/12/2023 |
|  | Concept 2 | "pharmacy based measure"[Title/Abstract] OR "medication possession ratio"[Title/Abstract] OR "modified medication possession ratio"[Title/Abstract] OR (("fixatives"[Pharmacological Action] OR "fixatives"[MeSHTerms] OR "fixatives"[All Fields] OR "fixative"[All Fields] OR "fixed"[All Fields] OR "fixes"[All Fields] OR "fixing"[All Fields] OR "fixings"[All Fields]) AND "medication possession ratio"[Title/Abstract]) OR "proportion days covered"[Title/Abstract] OR ((("proportion"[All Fields] OR "proportions"[All Fields]) AND ("prescribability"[All Fields] OR "prescribable"[All Fields] OR "prescribe"[All Fields] OR "prescribed"[All Fields] OR "prescriber"[All Fields] OR "prescriber s"[All Fields] OR "prescribers"[All Fields] OR "prescribes"[All Fields] OR "prescribing"[All Fields])) AND "days covered"[Title/Abstract]) OR (("prescriptions"[MeSHTerms] OR "prescriptions"[All Fields] OR "prescription"[All Fields]) AND "possession ratio"[Title/Abstract]) OR "variable medication possession ratio"[Title/Abstract] OR "pharmacy claim"[Title/Abstract] OR "pharmacy fill"[Title/Abstract] OR (("pharmacie"[All Fields] OR "pharmacies"[MeSHTerms] OR "pharmacies"[All Fields] OR "pharmacy"[MeSHTerms] OR "pharmacy"[All Fields] OR "pharmacy s"[All Fields]) AND "databased"[Title/Abstract]) OR "pharmacy database"[Title/Abstract] OR "pharmacy dispensing data"[Title/Abstract] | 2820 | 18/12/2023 |
|  | Concept 3 | "medication adherence"[Title/Abstract] | 15.790 | 18/12/2023 |
|  | **All concept** | ((("chronic disease"[Title/Abstract] OR "Copd"[Title/Abstract] OR "chronic obstructive pulmonary disease"[Title/Abstract] OR "asthma"[Title/Abstract] OR "hypertension"[Title/Abstract] OR "hyperlipidemia"[Title/Abstract] OR "diabetes mellitus"[Title/Abstract]) AND "pharmacy based measure"[Title/Abstract]) OR "medication possession ratio"[Title/Abstract] OR "modified medication possession ratio"[Title/Abstract] OR (("fixatives"[Pharmacological Action] OR "fixatives"[MeSHTerms] OR "fixatives"[All Fields] OR "fixative"[All Fields] OR "fixed"[All Fields] OR "fixes"[All Fields] OR "fixing"[All Fields] OR "fixings"[All Fields]) AND "medication possession ratio"[Title/Abstract]) OR "proportion days covered"[Title/Abstract] OR ((("proportion"[All Fields] OR "proportions"[All Fields]) AND ("prescribability"[All Fields] OR "prescribable"[All Fields] OR "prescribe"[All Fields] OR "prescribed"[All Fields] OR "prescriber"[All Fields] OR "prescriber s"[All Fields] OR "prescribers"[All Fields] OR "prescribes"[All Fields] OR "prescribing"[All Fields])) AND "days covered"[Title/Abstract]) OR (("prescriptions"[MeSHTerms] OR "prescriptions"[All Fields] OR "prescription"[All Fields]) AND "possession ratio"[Title/Abstract]) OR "variable medication possession ratio"[Title/Abstract] OR "pharmacy claim"[Title/Abstract] OR "pharmacy fill"[Title/Abstract] OR (("pharmacie"[All Fields] OR "pharmacies"[MeSHTerms] OR "pharmacies"[All Fields] OR "pharmacy"[MeSHTerms] OR "pharmacy"[All Fields] OR "pharmacy s"[All Fields]) AND "databased"[Title/Abstract]) OR "pharmacy database"[Title/Abstract] OR "pharmacy dispensing data"[Title/Abstract]) AND "medication adherence"[Title/Abstract] | 779 | 18/12/2023 |
| Scopus | Concept 1 | TITLE-ABS-KEY ( "chronic disease" ) OR TITLE-ABS-KEY ( "diabetes mellitus" ) OR TITLE-ABS-KEY ( hypertension ) OR TITLE-ABS-KEY ( hyperlipidemia ) OR TITLE-ABS-KEY ( asthma ) OR TITLE-ABS-KEY ( copd) OR TITLE-ABS-KEY ( "chronic obstructive pulmonary disease" | 2.446.935 | 18/12/2023 |
|  | Concept 2 | TITLE-ABS-KEY ( "pharmacy based measure" ) OR TITLE-ABS-KEY ( "pharmacy claim" ) OR TITLE-ABS-KEY ( "pharmacy fill" ) OR TITLE ABS-KEY ( pharmacy AND database ) OR TITLE-ABS-KEY ( "medication possession ratio" ) OR TITLE-ABS-KEY ( "modified medication possession ratio" ) OR TITLE-ABS-KEY ( "fixed medication possession ratio" ) OR TITLE-ABS-KEY ( "proportion days covered" ) OR TITLE-ABS-KEY ( "variable medication possession ratio" ) OR TITLE-ABS-KEY ( "proprtionprescribe days covered" ) OR TITLE-ABS KEY ( "prescription possession ratio" ) | 9.877 | 18/12/2023 |
|  | Concept 3 | TITLE-ABS-KEY ( "MEDICATION ADHERENCE" ) | 34.388 | 18/12/2023 |
|  | **All concept** | TITLE-ABS-KEY ( "chronic disease" ) OR TITLE-ABS-KEY ( "diabetes mellitus" ) OR TITLE-ABS-KEY ( hypertension ) OR TITLE-ABS-KEY ( hyperlipidemia ) OR TITLE-ABS-KEY ( asthma ) OR TITLE-ABS-KEY ( copd ) OR TITLE-ABS-KEY ( "chronic obstructive pulmonary disease" ) AND TITLE-ABS-KEY ( "pharmacy based measure" ) OR TITLE-ABS KEY ( "pharmacy claim" ) OR TITLE-ABS-KEY ( "pharmacy fill" ) OR TITLE-ABS-KEY ( pharmacy AND database ) OR TITLE-ABS-KEY ( "medication possession ratio" ) OR TITLE-ABS-KEY ( "modified medication possession ratio" ) OR TITLE-ABS-KEY ( "fixed medication possession ratio" ) OR TITLE-ABS-KEY ( "proportion days covered" ) OR TITLE-ABS-KEY ( "variable medication possession ratio" ) OR TITLE-ABS-KEY ( "proprtion prescribe days covered" ) OR TITLE-ABS KEY ( "prescription possession ratio" ) OR TITLE-ABS-KEY ( "pharmacy dispensing data" ) AND TITLE-ABS-KEY ( "MEDICATION ADHERENCE" ) | 734 | 18/12/2023 |

**Table S2.** Result Table

| **Characteristics** | **Number Of Study** | **References** |
| --- | --- | --- |
| **Study Period (Months)** | | |
| <12 | 16 | 43,46,47,53,54,63,65,69–71,74,79,95,108,110,112 |
| 12-24 | 46 | 44,48–52,56,57,59–62,64,66–68,72,73,75–78,81,82,84–86,88,90,91,93,97–106,109,113,114,117 |
| 25-36 | 6 | 55,58,80,83,92,96 |
| 37-48 | 1 | 87 |
| > 48 | 5 | 45,89,94,111,115 |
| **Setting (Country)** | | |
| **Studies Conducted Across the United States** | | |
| Unspecified United State | 13 | 43,46,48,49,56,65,66,76,83,92,110,112,113 |
| Texas | 7 | 62,63,68,91,96,105,111 |
| New York | 4 | 51,80,95,101 |
| Colorado | 5 | 50,58,71,90,93 |
| Oregon | 5 | 50,95,98,106 |
| Washington | 3 | 50,95,99 |
| Puerto Rico | 2 | 43,117 |
| Maryland | 2 | 54,58 |
| Alabama | 1 | 77 |
| California | 2 | 50,73 |
| Minnesota | 1 | 109 |
| Pennsylvania | 1 | 97 |
| South Carolina | 1 | 108 |
| Virgin Island | 1 | 43 |
| Wisconsin | 1 | 67 |
| Utah | 1 | 84 |
| **Research Was Conducted in Several Other Countries** | | |
| Canada | 7 | 52,70,78,82,85,86,114 |
| Malaysia | 3 | 47,69,74 |
| Netherlands | 3 | 72,81,103 |
| United Kingdom | 3 | 75,89,94 |
| Australia | 2 | 44,55 |
| New Zealand | 2 | 60,102 |
| Colombia | 1 | 79 |
| France | 1 | 64 |
| Hong Kong | 1 | 115 |
| India | 1 | 53 |
| Indiana | 1 | 87 |
| Indonesia | 1 | 59 |
| Portugal | 1 | 57 |
| Sierra Leone | 1 | 61 |
| Singapore | 1 | 88 |
| South Africa | 1 | 45 |
| Sweden | 1 | 104 |
| Brazil | 1 | 100 |
| **Type of Disease** | | |
| Asthma | 17 | 44,45,52,65,66,73,78,81,84–86,89,90,94,100,109,114 |
| Chronic Obstructive Pulmonary Disease (COPD) | 2 | 52,95 |
| Diabetes Mellitus | 40 | 46–48,50,51,53,56,60,62–64,67,68,71,72,75,76,79,80,83,87,88,91–93,96–99,101,103–106,108,110,112,113,117 |
| Hyperlipidemia | 16 | 43,48,49,55,63,68,71,74,82,88,91–93,97,101,110 |
| Hypertension | 27 | 43,48,54–59,61,63,68–71,74,77,80,88,91–93,97,101,102,110,111,115 |
| **Design Study** | | |
| Retrospective Cohort | 53 | 43,44,46–49,52,53,55–57,59–63,65,66,68,70,71,73,75–80,83,84,87–89,92–94,96,98,100–105,108–113,115,117 |
| Cross-Sectional | 5 | 45,50,58,95,114 |
| Quasi-Experimental | 4 | 67,91,97,106 |
| Nasted Case-Control | 1 | 81 |
| Randomized Control Trial | 11 | 51,54,64,69,72,74,82,86,90,99,85 |
| **Type of Pharmacy-Based Measure Matrix** | | |
| Medication possession ratio (MPR) | 46 | 45–47,49,51,53,59–62,64,69,71–75,79–82,84–88,91,94,96–109,111–114 |
| Proportion of days covered (PDC) | 31 | 43–45,47,48,50,52–56,58,62,63,65–68,70,71,76,77,84,87,92,93,110,115–117 |
| Modified medication  possession ratio  (MPRm) | 1 | 45 |
| Refill compliance rate (RCR) | 1 | 45 |
| Compliance ratio (CR) | 1 | 45 |
| Continuous multiple-interval measurement of oversupply  (CMOS) | 1 | 45 |
| Continuous singleinterval measure of medication acquisition (CSA) | 1 | 45 |
| Adjusted MPR (aMPR) | 1 | 62 |
| ReComp | 1 | 95 |
| Primary adherence | 1 | 57 |
| Number of days covered | 1 | 83 |
| Prescription possession ratio (PPR) | 1 | 89 |
| **Suitability** | | |
| **Studies That Have Validity Characteristics** | | |
| Complete | 2 | 44,51 |
| Accurate | 16 | 44,53,55,69,71,72,80,84,85,87,90,94,95,102,103,114 |
| Objective | 30 | 46,47,51,54,60,61,64,66,69,72,74,75,77,79–81,85,87,88,90,94,95,97,98,105,106,108,114,115 |
| Provides a continuous record of adherence history | 73 | 43–64,66–106,108–111,113–115,117 |
| Provide reliable measurements | 3 | 55,85,109 |
| Unobtrusive in order not to affect patient behavior | 2 | 46,72 |
| Have good sensitivity | 7 | 48,73,76,93,96,97,99 |
| **Other Information That Support Validity** | | |
| Estimation of medication adherence is more real and accurate when PDC is integrated with primary adherence measurement | 1 | 78 |
| Validated measure of medication adherence | 7 | 45,70,79,85,104,110,117 |
| A standardized method to measure patient medication adherence | 1 | 70 |
| A standard threshold that has been shown to be associated with improved health outcomes | 1 | 43 |
| A comparative analysis | 1 | 49 |
| Medication adherence measurement is not affected by recall bias | 1 | 100 |
| **Studies That Do Not Show Suitability Characteristics** | | |
| This method is not suitable, because when compared to the proportion of days covered (PDC) matrix, inhaler sensor technology is a more objective and reliable measure that provides direct and accurate data on patterns of medication use and adherence, allowing measures of adherence to prescribed doses to be calculated | 1 | 65 |
| **Studies with Characteristics of Applicability** | | |
| Easy to intrepret | 39 | 43–45,47,48,52–56,58,59,61–63,66,67,70,71,73,75–77,82–84,86,88,93,95,97–99,101,102,104,105,113,114 |
| Easy to use | 7 | 45,51,52,59,72,84,91 |
| Inexpensive | 3 | 59,61,106 |
| **Other Information That Support Applicability** | | |
| Can be used on large populations | 47 | 45–49,56,57,59–68,70,71,75,77,78,80,81,83–86,89,90,92–95,97–99,101,102,104,105,108,110–112,117 |
| Accuracy of refill adherence measurement increases with longer study intervals | 1 | 90 |
| Can see medication adherence at medication switching and overlapping prescription fills | 5 | 55,77,96,105,113 |
| Can be used to measure medication adherence with mono-therapy and dual therapy | 4 | 44,77,105,113 |
| Can be used for early identification of non-adherence | 1 | 57 |
| Real world data | 5 | 50,87,89,100,109 |
| Can be used to measure adherence to long term medication | 3 | 69,111,113 |
| Feasible to implementing in clinical use | 1 | 52 |
| Effective for measuring adherence in patients with chronic diseases | 2 | 49,55 |
| Can avoid the hawthorne effect | 1 | 72 |
| Using data collected from pharmacy dispensing data, the completeness of the data is more assured than with registrations of prescribed drugs at health centers | 1 | 104 |
| Refill behavior correlates with actual medication consumption | 1 | 98 |
| Effective for measuring medication adherence in chronic conditions | 1 | 49 |
| The use of an integrated pharmacy claims database across all pharmacies can improve the reliability of medication adherence measurement | 1 | 44 |
| effective measure medication adherence in asthma patients, provided the inhaler is used consistently as a control medication rather than only as needed | 1 | 106 |
| **Weakness** | | |
| Cannot assess the patient's actual drug consumption | 28 | 44,46,52,56,63,65,71–74,77,80,83,87,88,92,94,95,99,103–106,109,111,112,114,115 |
| Does not accurately capture the amount of medication contained in a single dose and does not take into account the impact of dosing frequency and dosing adjustments | 1 | 43,83 |
| Under/Overestimation medication adherence | 12 | 43,47,57,65,67,68,78,82,91,96,100,110 |
| Non-capture of medication switching | 1 | 43 |
| Measurements were limited to the pharmacy where the patient refilled the prescription | 1 | 55 |

**Table S3.** NOS-scale Quality Assessment for Cohort Studies

| **No** | **Author, (years)** | **Selection** | | | | | | | | | | | | | **Comparability** | | **Outcome** | | | | | | | | | | |  |
| --- | --- | --- | --- | --- | --- | --- | --- | --- | --- | --- | --- | --- | --- | --- | --- | --- | --- | --- | --- | --- | --- | --- | --- | --- | --- | --- | --- | --- |
| **Representativeness of the exposed cohort** | | | | **Selection of the non-exposed cohort** | | | **Ascertainment of exposure** | | | | **Demonstration that outcome of interest was not present at start of study** | | **Comparability of cohorts on the basis of the design or analysis controlled for confounders** | | **Assessment of outcome** | | | | **Was follow-up long enough for outcomes to occur** | | | **Adequacy of follow-up of cohorts** | | | | **Total** |
| **1*** | **2*** | **3*** | **4*** | **5*** | **6*** | **7*** | **8*** | **9*** | **10*** | **11*** | **12*** | **13*** | **14*** | **15*** | **16*** | **17*** | **18*** | **19*** | | **20*** | **21*** | **22*** | **22*** | **23*** | **24*** |
|  | Jackson, et al (2022) 43 | 1 | 0 | 0 | 0 | 0 | 0 | 0 | 1 | 0 | 0 | 0 | 1 | 0 | 1 | 1 | 0 | 1 | 0 | 0 | | 1 | 0 | 1 | 0 | 0 | 0 | 8 |
|  | Serhal, et al (2022) 44 | 1 | 0 | 0 | 0 | 0 | 0 | 0 | 1 | 0 | 0 | 0 | 1 | 0 | 1 | 1 | 0 | 1 | 0 | 0 | | 1 | 0 | 1 | 0 | 0 | 0 | 8 |
|  | Torres-Robles, et al (2019) 55 | 1 | 0 | 0 | 0 | 0 | 0 | 0 | 1 | 0 | 0 | 0 | 1 | 0 | 1 | 1 | 0 | 1 | 0 | 0 | | 1 | 0 | 1 | 0 | 0 | 0 | 8 |
|  | Wolf, et al (2020) 66 | 1 | 0 | 0 | 0 | 1 | 0 | 0 | 1 | 0 | 0 | 0 | 1 | 0 | 1 | 1 | 0 | 1 | 0 | 0 | | 1 | 0 | 1 | 0 | 0 | 0 | 9 |
|  | Piercefield, et al (2017) 77 | 1 | 0 | 0 | 0 | 1 | 0 | 0 | 1 | 0 | 0 | 0 | 1 | 0 | 1 | 1 | 0 | 1 | 0 | 0 | | 1 | 0 | 1 | 0 | 0 | 0 | 9 |
|  | Nair P, et al (2020) 88 | 1 | 0 | 0 | 0 | 1 | 0 | 0 | 1 | 0 | 0 | 0 | 1 | 0 | 1 | 1 | 0 | 1 | 0 | 0 | | 1 | 0 | 0 | 1 | 0 | 0 | 9 |
|  | Marupuru S, et al (2021) 110 | 1 | 0 | 0 | 0 | 1 | 0 | 0 | 1 | 0 | 0 | 0 | 1 | 0 | 1 | 1 | 0 | 1 | 0 | 0 | | 1 | 0 | 1 | 0 | 0 | 0 | 9 |
|  | Wong MC, et al ( 2013) 115 | 1 | 0 | 0 | 0 | 1 | 0 | 0 | 1 | 0 | 0 | 0 | 1 | 0 | 1 | 1 | 0 | 1 | 0 | 0 | | 1 | 0 | 1 | 0 | 0 | 0 | 9 |
|  | Wolever RQ and Dreusicke MH (2016) 46 | 1 | 0 | 0 | 0 | 0 | 0 | 0 | 1 | 0 | 0 | 0 | 1 | 0 | 1 | 1 | 0 | 1 | 0 | 0 | | 1 | 0 | 1 | 0 | 0 | 0 | 8 |
|  | Lim MT, et al (2021) 47 | 1 | 0 | 0 | 0 | 0 | 0 | 0 | 1 | 0 | 0 | 0 | 1 | 0 | 1 | 1 | 0 | 1 | 0 | 0 | | 1 | 0 | 1 | 0 | 0 | 0 | 8 |
|  | Borah BJ, et al (2016) 48 | 1 | 0 | 0 | 0 | 0 | 0 | 0 | 1 | 0 | 0 | 0 | 1 | 0 | 1 | 1 | 0 | 1 | 0 | 0 | | 1 | 0 | 1 | 0 | 0 | 0 | 8 |
|  | Jung et al (2012) 49 | 1 | 0 | 0 | 0 | 0 | 0 | 0 | 1 | 0 | 0 | 0 | 1 | 0 | 1 | 1 | 0 | 1 | 0 | 0 | | 1 | 0 | 1 | 0 | 0 | 0 | 8 |
|  | Prabhu, et al (2023) 53 | 1 | 0 | 0 | 0 | 0 | 0 | 0 | 1 | 0 | 0 | 0 | 1 | 0 | 1 | 1 | 0 | 1 | 0 | 0 | | 1 | 0 | 1 | 0 | 0 | 0 | 8 |
|  | Gooptu, et al (2021) 56 | 1 | 0 | 0 | 0 | 0 | 0 | 0 | 1 | 0 | 0 | 0 | 1 | 0 | 1 | 1 | 0 | 1 | 0 | 0 | | 1 | 0 | 1 | 0 | 0 | 0 | 8 |
|  | Puspitasari, et al (2022) 59 | 1 | 0 | 0 | 0 | 0 | 0 | 0 | 1 | 0 | 0 | 0 | 1 | 0 | 1 | 1 | 0 | 1 | 0 | 0 | | 1 | 0 | 1 | 0 | 0 | 0 | 8 |
|  | Chepulis, et al (2020) 60 | 1 | 0 | 0 | 0 | 0 | 0 | 0 | 1 | 0 | 0 | 0 | 1 | 0 | 1 | 1 | 0 | 1 | 0 | 0 | | 1 | 0 | 1 | 0 | 0 | 0 | 8 |
|  | Herskind, et al (2020) 61 | 1 | 0 | 0 | 0 | 0 | 0 | 0 | 1 | 0 | 0 | 0 | 1 | 0 | 1 | 1 | 0 | 1 | 0 | 0 | | 1 | 0 | 1 | 0 | 0 | 0 | 8 |
|  | Hernández-Muñoz, et al (2021) 117 | 1 | 0 | 0 | 0 | 0 | 0 | 0 | 1 | 0 | 0 | 0 | 1 | 0 | 1 | 1 | 0 | 1 | 0 | 0 | | 1 | 0 | 1 | 0 | 0 | 0 | 8 |
|  | Zhang, et al (2020) 62 | 1 | 0 | 0 | 0 | 1 | 0 | 0 | 1 | 0 | 0 | 0 | 1 | 0 | 1 | 1 | 0 | 1 | 0 | 0 | | 1 | 0 | 1 | 0 | 0 | 0 | 9 |
|  | Hong, et al (2020) 63 | 1 | 0 | 0 | 0 | 1 | 0 | 0 | 1 | 0 | 0 | 0 | 1 | 0 | 1 | 1 | 0 | 1 | 0 | 0 | | 1 | 0 | 1 | 0 | 0 | 0 | 9 |
|  | Stanford, et al (2020) 65 | 1 | 0 | 0 | 0 | 0 | 0 | 0 | 1 | 0 | 0 | 0 | 1 | 0 | 1 | 1 | 0 | 1 | 0 | 0 | | 1 | 0 | 1 | 0 | 0 | 0 | 8 |
|  | Mann, et al (2019) 68 | 1 | 0 | 0 | 0 | 1 | 0 | 0 | 1 | 0 | 0 | 0 | 1 | 0 | 1 | 1 | 0 | 1 | 0 | 0 | | 1 | 0 | 1 | 0 | 0 | 0 | 9 |
|  | Winslade, N. and Tamblyn, R. (2017) 70 | 1 | 0 | 0 | 0 | 1 | 0 | 0 | 1 | 0 | 0 | 0 | 1 | 0 | 1 | 0 | 0 | 1 | 0 | 0 | | 1 | 0 | 1 | 0 | 0 | 0 | 8 |
|  | Oung, et al (2017) 71 | 1 | 0 | 0 | 0 | 0 | 0 | 0 | 1 | 0 | 0 | 0 | 1 | 0 | 1 | 1 | 0 | 1 | 0 | 0 | | 1 | 0 | 1 | 0 | 0 | 0 | 8 |
|  | Bidwal,et al (2017) 73 | 0 | 1 | 0 | 0 | 0 | 0 | 0 | 1 | 0 | 0 | 0 | 1 | 0 | 0 | 1 | 0 | 1 | 0 | 0 | | 1 | 0 | 1 | 0 | 0 | 0 | 7 |
|  | Farmer, et al (2016) 75 | 1 | 0 | 0 | 0 | 1 | 0 | 0 | 1 | 0 | 0 | 0 | 1 | 0 | 1 | 1 | 0 | 1 | 0 | 0 | | 1 | 0 | 1 | 0 | 0 | 0 | 9 |
|  | Peaslee,et al (2016) 76 | 0 | 1 | 0 | 0 | 1 | 0 | 0 | 1 | 0 | 0 | 0 | 1 | 0 | 1 | 1 | 0 | 1 | 0 | 0 | | 1 | 0 | 1 | 0 | 0 | 0 | 9 |
|  | Blais, et al (2017) 78 | 1 | 0 | 0 | 0 | 0 | 0 | 0 | 1 | 0 | 0 | 0 | 1 | 0 | 1 | 1 | 0 | 1 | 0 | 0 | | 1 | 0 | 1 | 0 | 0 | 0 | 8 |
|  | Machado-Alba, et al (2017) 79 | 1 | 0 | 0 | 0 | 1 | 0 | 0 | 1 | 0 | 0 | 0 | 1 | 0 | 1 | 1 | 0 | 1 | 0 | 0 | | 1 | 0 | 1 | 0 | 0 | 0 | 9 |
|  | De Leon, et al (2015) 80 | 1 | 0 | 0 | 0 | 1 | 0 | 0 | 1 | 0 | 0 | 0 | 1 | 0 | 1 | 1 | 0 | 1 | 0 | 0 | | 1 | 0 | 1 | 0 | 0 | 0 | 9 |
|  | Bibeau, et al (2016) 83 | 0 | 0 | 0 | 0 | 1 | 0 | 0 | 1 | 0 | 0 | 0 | 1 | 0 | 1 | 1 | 0 | 1 | 0 | 0 | | 1 | 0 | 1 | 0 | 0 | 0 | 8 |
|  | Feehan, et al (2015) 84 | 1 | 0 | 0 | 0 | 0 | 0 | 0 | 1 | 0 | 0 | 0 | 1 | 0 | 1 | 1 | 0 | 1 | 0 | 0 | | 1 | 0 | 1 | 0 | 0 | 0 | 8 |
|  | Zhu, et al (2014) 87 | 1 | 0 | 0 | 0 | 0 | 0 | 0 | 1 | 0 | 0 | 0 | 1 | 0 | 1 | 1 | 0 | 1 | 0 | 0 | | 1 | 0 | 1 | 0 | 0 | 0 | 8 |
|  | Taylor et al (2014) 89 | 1 | 0 | 0 | 0 | 1 | 0 | 0 | 1 | 0 | 0 | 0 | 1 | 0 | 1 | 1 | 0 | 1 | 0 | 0 | | 1 | 0 | 1 | 0 | 0 | 0 | 9 |
|  | Iyengar et al (2013) 92 | 0 | 1 | 0 | 0 | 1 | 0 | 0 | 1 | 0 | 0 | 0 | 1 | 0 | 1 | 1 | 0 | 1 | 0 | 0 | | 1 | 0 | 1 | 0 | 0 | 0 | 9 |
|  | Raebel et al (2011) 93 | 1 | 0 | 0 | 0 | 0 | 0 | 0 | 1 | 0 | 0 | 0 | 1 | 0 | 1 | 1 | 0 | 1 | 0 | 0 | | 1 | 0 | 1 | 0 | 0 | 0 | 8 |
|  | Elkout et al (2012) 94 | 1 | 0 | 0 | 0 | 0 | 0 | 0 | 1 | 0 | 0 | 0 | 1 | 0 | 1 | 1 | 0 | 1 | 0 | 0 | | 1 | 0 | 1 | 0 | 0 | 0 | 8 |
|  | Barner et al (2011) 96 | 1 | 0 | 0 | 0 | 1 | 0 | 0 | 1 | 0 | 0 | 0 | 1 | 0 | 1 | 1 | 0 | 1 | 0 | 0 | | 1 | 0 | 1 | 0 | 0 | 0 | 9 |
|  | Hunt et al (2009) 98 | 1 | 0 | 0 | 0 | 1 | 0 | 0 | 1 | 0 | 0 | 0 | 1 | 0 | 1 | 1 | 0 | 1 | 0 | 0 | | 1 | 0 | 1 | 0 | 0 | 0 | 9 |
|  | Jentzsch et al (2009) 100 | 1 | 0 | 0 | 0 | 0 | 0 | 0 | 1 | 0 | 0 | 0 | 1 | 0 | 1 | 0 | 0 | 1 | 0 | 0 | | 1 | 0 | 1 | 0 | 0 | 0 | 7 |
|  | Jing et al (2011) 101 | 1 | 0 | 0 | 0 | 0 | 0 | 0 | 1 | 0 | 0 | 0 | 1 | 0 | 1 | 1 | 0 | 1 | 0 | 0 | | 1 | 0 | 1 | 0 | 0 | 0 | 8 |
|  | Warren et al (2011) 102 | 1 | 0 | 0 | 0 | 1 | 0 | 0 | 1 | 0 | 0 | 0 | 1 | 0 | 1 | 1 | 0 | 1 | 0 | 0 | | 1 | 0 | 1 | 0 | 0 | 0 | 9 |
|  | Voorham et al (2011) 103 | 1 | 0 | 0 | 0 | 1 | 0 | 0 | 1 | 0 | 0 | 0 | 1 | 0 | 1 | 1 | 0 | 1 | 0 | 0 | | 1 | 0 | 1 | 0 | 0 | 0 | 9 |
|  | Haupt et al (2009) 104 | 1 | 0 | 0 | 0 | 0 | 0 | 0 | 1 | 0 | 0 | 0 | 1 | 0 | 1 | 1 | 0 | 1 | 0 | 0 | | 1 | 0 | 1 | 0 | 0 | 0 | 8 |
|  | Cheong et al (2008) 105 | 0 | 1 | 0 | 0 | 1 | 0 | 0 | 1 | 0 | 0 | 0 | 1 | 0 | 1 | 1 | 0 | 1 | 0 | 0 | | 1 | 0 | 1 | 0 | 0 | 0 | 9 |
|  | Rozenfeld et al (2008) 98 | 1 | 0 | 0 | 0 | 0 | 0 | 0 | 1 | 0 | 0 | 0 | 1 | 0 | 1 | 1 | 0 | 1 | 0 | 0 | | 1 | 0 | 1 | 0 | 0 | 0 | 8 |
|  | Lawrence et al (2006) 108 | 1 | 0 | 0 | 0 | 0 | 0 | 0 | 1 | 0 | 0 | 0 | 1 | 0 | 1 | 1 | 0 | 1 | 0 | 0 | | 1 | 0 | 1 | 0 | 0 | 0 | 8 |
|  | Kelloway et al (2000) 109 | 0 | 1 | 0 | 0 | 0 | 0 | 0 | 1 | 0 | 0 | 0 | 1 | 0 | 1 | 1 | 0 | 1 | 0 | 0 | | 1 | 0 | 1 | 0 | 0 | 0 | 8 |
|  | Vincze et al (2008) 111 | 1 | 0 | 0 | 0 | 1 | 0 | 0 | 1 | 0 | 0 | 0 | 1 | 0 | 1 | 1 | 0 | 1 | 0 | 0 | | 1 | 0 | 1 | 0 | 0 | 0 | 9 |
|  | Melikian, et al (2002) 112 | 0 | 1 | 0 | 0 | 0 | 0 | 0 | 1 | 0 | 0 | 0 | 1 | 0 | 1 | 1 | 0 | 1 | 0 | 0 | | 1 | 0 | 1 | 0 | 0 | 0 | 8 |
|  | Vanderpoel et al 2004) 113 | 0 | 1 | 0 | 0 | 0 | 0 | 0 | 1 | 0 | 0 | 0 | 1 | 0 | 1 | 1 | 0 | 1 | 0 | 0 | | 1 | 0 | 1 | 0 | 0 | 0 | 8 |
|  | Yousif, et al (2022) 52 | 0 | 0 | 0 | 0 | 0 | 0 | 0 | 1 | 0 | 0 | 0 | 0 | 0 | 1 | 1 | 0 | 1 | 0 | 0 | | 1 | 0 | 1 | 0 | 0 | 0 | 6 |
|  | Coelho, (2023) 57 | 1 | 0 | 0 | 0 | 0 | 0 | 1 | 0 | 0 | 0 | 0 | 1 | 0 | 1 | 1 | 1 | 0 | 0 | 0 | | 1 | 0 | 1 | 0 | 0 | 0 | 8 |

**Information:**

**1*** Truly representative of the average _(describe) in the community

**2*** Somewhat representative of the average _ in the community

**3*** Selected group of users eg nurses, volunteers d) no description of the derivation of the cohort.

**4*** Drawn from the same community as the exposed cohort

**5*** Drawn from a different source

**6*** No description of the derivation of the non exposed cohort

**7*** Secure record (eg surgical records)

**8*** Structured interview

**9*** Written self report

**10*** No description

**11*** Yes

**12*** No

**13*** Study controls for __(select the most important factor)

**14*** Study controls for any additional factor (This criteria could be modified to indicate specific control for a second important factor.)

**15*** Independent blind assessment

**16*** Record linkage

**17*** Self report

**18*** No description

**19*** Yes (select an adequate follow up period for outcome of interest)

**21*** Adequacy of follow up of cohorts a) complete follow up - all subjects accounted for

**22*** Subjects lost to follow up unlikely to introduce bias (small number lost - > __% (select an adequate %) follow up, or description provided of those lost)

**24*** No statement

**Table S4.** NOS-scale Quality Assessment for Case-control studies

| **No** | **Author, (years)** | **Design study** | **Selection** | | | | | | | | | | **Comparability** | | **Exposure** | | | | | | | | | | **Total** |
| --- | --- | --- | --- | --- | --- | --- | --- | --- | --- | --- | --- | --- | --- | --- | --- | --- | --- | --- | --- | --- | --- | --- | --- | --- | --- |
| **Is the case definition adequate?** | | | **Representativeness of the cases** | | **Selection of Controls** | | | **Definition of Controls** | | **Comparability of cases and controls on the basis of the design or analysis** | | **Ascertainment of exposure** | | | | | **Same method of ascertainment for cases and controls** | | **Non-Response rate** | | |
| 1* | 2* | 3* | 4* | 5* | 6* | 7 | 8 | 9* | 10* | 11* | 12* | 13* | 14* | 15* | 16* | 17* | 18* | 19* | 20* | 21* | 22* |
| 1 | Vasbinder, et al (2016) 81 | Nested Case-Control | 1 | 0 | 0 | 1 | 0 | 1 | 0 | 0 | 1 | 0 | 1 | 1 | 1 | 0 | 0 | 0 | 0 | 1 | 0 | 1 | 0 | 0 | 9 |

**Information:**

1* Yes, with independent validation

2* Yes, eg record linkage or based on self reports

3* No description

4* All eligible cases with outcome of interest over a defined period of time, all cases in a defined catchment area, all cases in a defined hospital or clinic, group of hospitals, health maintenance organisation, or an appropriate sample of those cases (e.g. random sample)

5* Not satisfying requirements in part (a), or not stated.

6* Community controls (i.e., same community as cases and would be cases if had outcome)

7* Hospital controls, within same community as cases (i.e. not another city) but derived from a hospitalised population

8* No description

9* No history of disease (endpoint)

10* No description of source

11* Study controls for _ (Select the most important factor.)

12* Study controls for any additional factor (This criteria could be modified to indicate specific control for a second important factor)

13* Secure record (eg surgical records)

14* Structured interview where blind to case/control status

15* Interview not blinded to case/control status

16* Written self report or medical record only

17* No description

18* Yes

19* No

20* Same rate for both groups

21* Non respondents described

22* Rate different and no designation

**Table S5.** Modified Newcastle-ottawa Scale Quality Assessment for Cross-Sectional Studies

| **No** | **Author (Year)** | **Selection** | | | | **Comparability** | **Outcome:** | | **Total score** |
| --- | --- | --- | --- | --- | --- | --- | --- | --- | --- |
| **Representativeness of the sample** | **Sample size** | **Non-respondents:** | **Ascertainment of the exposure (risk factor):** | **Confounding factors controlled.** | **Assessment of outcome:** | **Statistical test:** |
|  | Adouni Lawani M, et al (2018) 114 | 1 | 1 | 1 | 2 | 2 | 2 | 1 | 10 |
|  | Obeng-Kus, et al (2020) 45 | 1 | 1 | 0 | 2 | 0 | 2 | 1 | 7 |
|  | Schmittdiel et al (2015) 50 | 1 | 1 | 0 | 2 | 2 | 2 | 1 | 9 |
|  | Genelin, et al (2023) 58 | 1 | 1 | 0 | 2 | 2 | 2 | 1 | 9 |
|  | Cecere et al (2012) 95 | 0 | 1 | 1 | 2 | 2 | 2 | 1 | 9 |

**Table S6. Revised Risk of Bias Assessment Tool For Nonrandomized Studies-2 (RoBINS-2)**

| **Domains** | **Details** | **Authors (years)** | | | | **Risk of Bias** |
| --- | --- | --- | --- | --- | --- | --- |
| **Moczygemba et al (2011)** 91 | **Zhang et al (2010)** 102 | **D'Souza et al (2010)** 106 | **Kim and Look (2019)** 67 |
| Comparability of the target group | Selection bias due to the selection of an inappropriate comparison target group | Low | Low | Low | Low | Low |
| Target group selection | Selection bias due to inappropriate intervention or inappropriate selection of exposure group or patient group | Low | Low | Low | Low | Low |
| Confounders | Selection bias due to inappropriate confounder confirmation and consideration | Low | Low | Low | Low | Low |
| Measurement of intervention/exposure | Performance bias due to inappropriate intervention or inappropriate exposure measurement | Low | Low | Low | Low | Low |
| Blinding of assessors | Detection bias due to inappropriate blinding of assessors | Low | Low | Low | Low | Low |
| Outcome assessment | Detection bias due to inappropriate outcome assessment methods | Low | Low | Low | Low | Low |
| Incomplete outcome data | Attrition bias due to inappropriate handling of incomplete data | Low | Low | Low | Low | Low |
| Selective outcome reporting | Reporting bias due to selective outcome reporting | Low | Low | Low | Low | Low |

**Table S7.** Jadad Scale Quality Assessment for Randomized Control Trial Studies

| **No** | **Author (Year)** | **Was the study described as randomised?** | **Was the method used to generate the sequence of randomisation described and appropriate?** | **Was the study described as double blind?** | **Was the method of double blinding described and appropriate ?** | **Was there a description of withdrawals and dropouts?** | **Deduct one point if the method used to generate the sequence of randomisation was described and it was inappropriate** | **Deduct one point if the study was described as double blind but the method of blinding was inappropriate** | **Total Score** |
| --- | --- | --- | --- | --- | --- | --- | --- | --- | --- |
| 1 | du Pon, et al (2019) 72 | 1 | 1 | 0 | 0 | 1 | 0 | 0 | 3 |
| 2 | Tan B Y, et al (2017) 74 | 1 | 1 | 0 | 0 | 1 | 0 | 0 | 3 |
| 3 | Odegard PS and Christensen DB (2012) 99 | 1 | 1 | 0 | 0 | 1 | 0 | 0 | 3 |
| 4 | Cohen et al (2010) 51 | 1 | 0 | 0 | 0 | 0 | 0 | 0 | 1 |
| 5 | Daugherty, et al (2021) 123 | 1 | 1 | 1 | 0 | 1 | 0 | 0 | 4 |
| 6 | Michiels, et al (2019) 64 | 1 | 1 | 0 | 0 | 1 | 0 | 0 | 3 |
| 7 | Tan, et al (2017) 69 | 1 | 1 | 0 | 0 | 1 | 0 | 0 | 3 |
| 8 | Rash,et al (2016) 82 | 1 | 1 | 1 | 1 | 0 | 0 | 0 | 4 |
| 9 | De Vera, et al (2014)86 | 1 | 1 | 0 | 0 | 0 | 0 | 0 | 2 |
| 10 | Bender et al (2015) 90 | 1 | 0 | 0 | 0 | 1 | 0 | 0 | 2 |
| 11 | Guénette, et al (2015)85 | 0 | 0 | 0 | 1 | 1 | 0 | 0 | 2 |
